# Supplementary material for: Origins of the current outbreak of multidrug-resistant malaria in southeast Asia: a retrospective genetic study
Source: PubMed Central journal article supplement (PMC5835763; doi:10.1016/s1473-3099(18)30068-9), 2018-03
Supplement: mmc1.pdf [file mmc1.pdf]

# THE LANCET Infectious Diseases

## Supplementary webappendix

This webappendix formed part of the original submission and has been peer reviewed. We post it as supplied by the authors.

Supplement to: Amato R, Pearson R D, Almagro-Garcia J, et al. Origins of the current outbreak of multidrug-resistant malaria in southeast Asia: a retrospective genetic study. *Lancet Infect Dis* 2018; published online Feb 1. [http://dx.doi.org/10.1016/S1473-3099\(18\)30068-9](http://dx.doi.org/10.1016/S1473-3099(18)30068-9).

## Appendix

# Origins of the current outbreak of multidrug resistant malaria in Southeast Asia: a retrospective genetic study

Roberto Amato PhD, Richard D. Pearson PhD, Jacob Almagro-Garcia PhD, Chanaki Amaratunga PhD, Pharath Lim MD, Seila Suon MD, Sokunthea Sreng, Eleanor Drury BSc[Hons], Jim Stalker MA, Olivo Miotto PhD, Rick M. Fairhurst MD, and Dominic P. Kwiatkowski FRCP

## Contents

|                                                                                                                  |    |
|------------------------------------------------------------------------------------------------------------------|----|
| Number of <i>kelch13</i> wild-type, heterozygous, and mutant samples in the dataset .....                        | 2  |
| Geographical distribution of the 38 <i>kelch13</i> haplogroups .....                                             | 3  |
| Temporal distribution of the 38 <i>kelch13</i> haplogroups .....                                                 | 4  |
| Temporal and geographical distribution of samples carrying <i>plasmepsin 2-3</i> amplification ...               | 5  |
| Distribution of samples carrying <i>plasmepsin 2-3</i> amplification across the <i>kelch13</i> haplogroups ..... | 6  |
| Co-ancestry matrix of 553 samples carrying homozygous <i>kelch13</i> mutations .....                             | 7  |
| Haplotype analysis of samples carrying <i>kelch13</i> mutations .....                                            | 8  |
| Genetic relatedness of KEL1 samples to all other samples .....                                                   | 9  |
| Analyses of haplotypes surrounding the <i>plasmepsin 2-3</i> genes .....                                         | 10 |
| Reconstruction of <i>kelch13</i> mutations epidemiological origin .....                                          | 11 |
| Breakpoints identified for the <i>plasmepsin 2-3</i> amplification .....                                         | 12 |
| Alleles that characterize the KEL1 haplogroup .....                                                              | 13 |

**Supplementary Table 1. Number of *kelch13* wild-type, heterozygous, and mutant samples in the dataset.** For each mutation, we also report the level of validation (validated, candidate, associated, unknown) of the allele as an artemisinin resistance marker, as specified by the WHO guidelines (<http://apps.who.int/iris/bitstream/10665/255213/1/WHO-HTM-GMP-2017.9-eng.pdf?ua=1> - accessed 30/Nov/17). SAS = South Asia; WSEA = Southeast Asia - West; ESEA = Southeast Asia - East.

| <i>kelch13</i>   | <i>kelch13</i> mutation | Level of validation as resistance marker | SAS        | WSEA    |                                | ESEA             |                      |                 |         |                      |      | Total      |
|------------------|-------------------------|------------------------------------------|------------|---------|--------------------------------|------------------|----------------------|-----------------|---------|----------------------|------|------------|
|                  |                         |                                          | Bangladesh | Myanmar | Thailand (Northwest and South) | Cambodia (North) | Cambodia (Northeast) | Cambodia (West) | Vietnam | Thailand (Northeast) | Laos |            |
| <i>Wild-type</i> |                         |                                          | 53         | 60      | 207                            | 86               | 121                  | 80              | 103     | 1                    | 92   | <b>803</b> |
| <i>Het</i>       |                         |                                          | 1          | 7       | 40                             | 4                | 1                    | 61              | 17      | 3                    | 2    | <b>136</b> |
| <i>Mutant</i>    | <i>Total</i>            |                                          |            | 34      | 86                             | 33               | 3                    | 323             | 57      | 15                   | 2    | <b>553</b> |
|                  | 580Y                    | Validated                                |            | 11      | 24                             | 26               | 3                    | 241             | 9       | 3                    |      | 317        |
|                  | 493H                    | Validated                                |            |         |                                | 5                |                      | 47              | 4       |                      |      | 56         |
|                  | 539T                    | Validated                                |            |         |                                | 2                |                      | 23              | 4       | 12                   | 2    | 43         |
|                  | 543T                    | Validated                                |            |         |                                |                  |                      | 2               | 22      |                      |      | 24         |
|                  | 441L                    | Candidate                                |            | 5       | 11                             |                  |                      |                 |         |                      |      | 16         |
|                  | 561H                    | Candidate                                |            | 2       | 13                             |                  |                      |                 |         |                      |      | 15         |
|                  | 675V                    | Candidate                                |            | 2       | 13                             |                  |                      |                 |         |                      |      | 15         |
|                  | 553L                    | Candidate                                |            |         | 2                              |                  |                      |                 | 9       |                      |      | 11         |
|                  | 538V                    | Candidate                                |            |         | 8                              |                  |                      |                 |         |                      |      | 8          |
|                  | 449A                    | Candidate                                |            | 2       | 3                              |                  |                      | 2               |         |                      |      | 7          |
|                  | 574L                    | Candidate                                |            | 6       | 1                              |                  |                      |                 |         |                      |      | 7          |
|                  | 353Y                    | Unknown                                  |            |         |                                |                  |                      |                 | 5       |                      |      | 5          |
|                  | 527H                    | Unknown                                  |            |         | 5                              |                  |                      |                 |         |                      |      | 5          |
|                  | 568G                    | Candidate                                |            |         |                                |                  |                      |                 | 4       |                      |      | 4          |
|                  | 481V                    | Associated                               |            |         | 2                              |                  |                      |                 | 2       |                      |      | 4          |
|                  | 446I                    | Candidate                                |            | 3       |                                |                  |                      |                 |         |                      |      | 3          |
|                  | 719N                    | Associated                               |            |         |                                |                  |                      |                 | 3       |                      |      | 3          |
|                  | 673I                    | Associated                               |            | 2       |                                |                  |                      |                 |         |                      |      | 2          |
|                  | 584V                    | Associated                               |            |         |                                |                  |                      |                 | 2       |                      |      | 2          |
|                  | 438N                    | Unknown                                  |            | 1       | 1                              |                  |                      |                 |         |                      |      | 2          |
| 443S             | Unknown                 |                                          |            | 1       |                                |                  |                      |                 |         |                      | 1    |            |
| 395Y             | Unknown                 |                                          |            |         |                                |                  |                      | 1               |         |                      | 1    |            |
| 614L             | Unknown                 |                                          |            | 1       |                                |                  |                      |                 |         |                      | 1    |            |
| 537I             | Associated              |                                          |            | 1       |                                |                  |                      |                 |         |                      | 1    |            |

Supplementary Table 2. Geographical distribution of the 38 *kelch13* haplogroups.

| <i>kelch13</i> haplogroup | Samples | <i>kelch13</i> mutation | Cambodia (West) | Cambodia (North) | Cambodia (Northeast) | Laos | Thailand (Northeast) | Vietnam | Myanmar | Thailand (Northwest and South) |
|---------------------------|---------|-------------------------|-----------------|------------------|----------------------|------|----------------------|---------|---------|--------------------------------|
| KEL1                      | 266     | 580Y                    | 226             | 26               | 2                    |      | 2                    | 9       |         | 1                              |
| KEL2                      | 49      | 493H                    | 40              | 5                |                      |      |                      | 4       |         |                                |
| KEL3                      | 40      | 539T                    | 21              | 2                |                      | 2    | 11                   | 4       |         |                                |
| KEL4                      | 28      | 580Y                    |                 |                  | 1                    |      | 1                    |         | 11      | 15                             |
| KEL5                      | 24      | 543T                    | 2               |                  |                      |      |                      | 22      |         |                                |
| KEL6                      | 15      | 675V                    |                 |                  |                      |      |                      |         | 2       | 13                             |
| KEL7                      | 13      | 580Y                    | 13              |                  |                      |      |                      |         |         |                                |
| KEL8                      | 11      | 561H                    |                 |                  |                      |      |                      |         |         | 11                             |
| KEL9                      | 9       | 553L                    |                 |                  |                      |      |                      | 7       |         | 2                              |
| KEL10                     | 8       | 580Y                    |                 |                  |                      |      |                      |         |         | 8                              |
| KEL11                     | 8       | 538V                    |                 |                  |                      |      |                      |         |         | 8                              |
| KEL12                     | 8       | 441L                    |                 |                  |                      |      |                      |         |         | 8                              |
| KEL13                     | 7       | 574L                    |                 |                  |                      |      |                      |         | 6       | 1                              |
| KEL14                     | 7       | 449A                    | 2               |                  |                      |      |                      |         | 2       | 3                              |
| KEL15                     | 5       | 441L                    |                 |                  |                      |      |                      |         | 3       | 2                              |
| KEL16                     | 5       | 527H                    |                 |                  |                      |      |                      |         |         | 5                              |
| KEL17                     | 4       | 493H                    | 4               |                  |                      |      |                      |         |         |                                |
| KEL18                     | 4       | 568G                    |                 |                  |                      |      |                      | 4       |         |                                |
| KEL19                     | 4       | 353Y                    |                 |                  |                      |      |                      | 4       |         |                                |
| KEL20                     | 4       | 561H                    |                 |                  |                      |      |                      |         | 2       | 2                              |
| KEL21                     | 4       | 481V                    | 2               |                  |                      |      |                      |         |         | 2                              |
| KEL22                     | 3       | 493H                    | 3               |                  |                      |      |                      |         |         |                                |
| KEL23                     | 3       | 441L                    |                 |                  |                      |      |                      |         | 2       | 1                              |
| KEL24                     | 3       | 719N                    | 3               |                  |                      |      |                      |         |         |                                |
| KEL25                     | 3       | 446I                    |                 |                  |                      |      |                      |         | 3       |                                |
| KEL26                     | 2       | 553L                    |                 |                  |                      |      |                      | 2       |         |                                |
| KEL27                     | 2       | 539T                    | 1               |                  |                      |      | 1                    |         |         |                                |
| KEL28                     | 2       | 438N                    |                 |                  |                      |      |                      |         | 1       | 1                              |
| KEL29                     | 2       | 584V                    | 2               |                  |                      |      |                      |         |         |                                |
| KEL30                     | 2       | 673I                    |                 |                  |                      |      |                      |         | 2       |                                |
| KEL31                     | 1       | 580Y                    | 1               |                  |                      |      |                      |         |         |                                |
| KEL32                     | 1       | 614L                    |                 |                  |                      |      |                      |         |         | 1                              |
| KEL33                     | 1       | 353Y                    |                 |                  |                      |      |                      | 1       |         |                                |
| KEL34                     | 1       | 580Y                    | 1               |                  |                      |      |                      |         |         |                                |
| KEL35                     | 1       | 537I                    |                 |                  |                      |      |                      |         |         | 1                              |
| KEL36                     | 1       | 395Y                    | 1               |                  |                      |      |                      |         |         |                                |
| KEL37                     | 1       | 539T                    | 1               |                  |                      |      |                      |         |         |                                |
| KEL38                     | 1       | 443S                    |                 |                  |                      |      |                      |         |         | 1                              |

Supplementary Table 3. Temporal distribution of the 38 *kelch13* haplogroups.

| <i>kelch13</i> haplogroup | 2002-2006 | 2007 | 2008 | 2009 | 2010 | 2011 | 2012 | 2013 |
|---------------------------|-----------|------|------|------|------|------|------|------|
| KEL1                      |           | 1    | 14   | 23   | 46   | 101  | 48   | 33   |
| KEL2                      |           | 6    | 2    | 8    | 14   | 12   | 2    | 5    |
| KEL3                      |           | 2    | 5    | 2    | 4    | 16   | 8    | 3    |
| KEL4                      |           |      |      |      |      | 19   | 8    | 1    |
| KEL5                      |           |      |      |      | 7    | 13   | 4    |      |
| KEL6                      |           |      | 2    |      |      | 8    | 5    |      |
| KEL7                      |           |      | 3    | 4    | 5    | 1    |      |      |
| KEL8                      |           |      |      |      |      |      | 5    | 6    |
| KEL9                      |           |      |      |      | 4    | 4    | 1    |      |
| KEL10                     |           |      |      |      |      |      | 4    | 4    |
| KEL11                     |           |      |      |      |      | 1    | 7    |      |
| KEL12                     |           |      | 1    |      |      | 1    | 3    | 3    |
| KEL13                     |           |      |      |      |      | 5    | 2    |      |
| KEL14                     |           |      |      | 2    |      |      | 5    |      |
| KEL15                     |           |      |      |      |      | 2    | 2    | 1    |
| KEL16                     |           |      | 4    |      | 1    |      |      |      |
| KEL17                     |           | 1    | 1    | 2    |      |      |      |      |
| KEL18                     |           |      |      |      | 3    | 1    |      |      |
| KEL19                     |           |      |      |      | 4    |      |      |      |
| KEL20                     | 2         |      |      |      |      |      | 2    |      |
| KEL21                     |           |      | 2    |      |      | 1    |      | 1    |
| KEL22                     |           |      |      |      | 2    | 1    |      |      |
| KEL23                     |           |      |      |      |      | 2    | 1    |      |
| KEL24                     |           |      |      |      |      | 1    |      | 2    |
| KEL25                     |           |      |      |      |      | 2    | 1    |      |
| KEL26                     |           |      |      | 1    | 1    |      |      |      |
| KEL27                     |           |      |      |      |      | 1    | 1    |      |
| KEL28                     |           |      | 1    |      |      |      | 1    |      |
| KEL29                     |           |      | 1    | 1    |      |      |      |      |
| KEL30                     |           |      |      |      |      | 2    |      |      |
| KEL31                     |           |      |      |      |      | 1    |      |      |
| KEL32                     |           |      |      |      |      |      | 1    |      |
| KEL33                     |           |      |      |      | 1    |      |      |      |
| KEL34                     |           |      |      |      |      | 1    |      |      |
| KEL35                     |           |      |      |      |      |      | 1    |      |
| KEL36                     |           |      |      | 1    |      |      |      |      |
| KEL37                     |           |      |      |      |      | 1    |      |      |
| KEL38                     | 1         |      |      |      |      |      |      |      |

**Supplementary Table 4. Temporal and geographical distribution of samples carrying *plasmepsin 2-3* amplification.**

|              | Cambodia (West) | Cambodia (North) | Cambodia (Northeast) | Thailand (Northwest) |
|--------------|-----------------|------------------|----------------------|----------------------|
| 2008         | 8               |                  |                      | 2                    |
| 2009         | 9               |                  |                      |                      |
| 2010         | 31              |                  |                      |                      |
| 2011         | 64              |                  |                      |                      |
| 2012         | 43              | 4                |                      |                      |
| 2013         | 30              | 7                | 1                    |                      |
| <b>Total</b> | <b>185</b>      | <b>11</b>        | <b>1</b>             | <b>2</b>             |

**Supplementary Table 5. Distribution of samples carrying *plasmepsin 2-3* amplification across the *kelch13* haplogroups.**

| <i>kelch13</i>   | <i>kelch13</i> haplogroup | 2008 | 2009 | 2010 | 2011 | 2012 | 2013 | Total      |
|------------------|---------------------------|------|------|------|------|------|------|------------|
| <i>Wild-type</i> |                           | 2    |      |      | 10   | 1    | 4    | <b>17</b>  |
| <i>Het</i>       |                           | 3    | 1    | 7    | 8    | 8    | 1    | <b>28</b>  |
| <i>Mutant</i>    | <i>Total</i>              | 5    | 8    | 24   | 46   | 38   | 33   | <b>154</b> |
|                  | KEL1                      | 4    | 6    | 22   | 41   | 37   | 30   | <b>140</b> |
|                  | KEL2                      |      |      |      | 3    | 1    | 2    | <b>6</b>   |
|                  | KEL7                      | 1    | 1    | 1    | 1    |      |      | <b>4</b>   |
|                  | KEL22                     |      |      | 1    |      |      |      | <b>1</b>   |
|                  | KEL24                     |      |      |      |      |      | 1    | <b>1</b>   |
|                  | KEL31                     |      |      |      | 1    |      |      | <b>1</b>   |
|                  | KEL36                     |      | 1    |      |      |      |      | <b>1</b>   |

**Supplementary Figure 1. Co-ancestry matrix of 553 samples carrying homozygous *kelch13* mutations.** (A) The matrix has 553 rows and columns and is symmetric along the diagonal. The complete hierarchical clustering dendrogram is reported on the left. Red colours represent higher level of co-ancestry (arbitrary unit). (B) Two-dimensional visualization of the same co-ancestry matrix using t-SNE, a dimensionality reduction approach. Each dot represents a sample coloured according to the *kelch13* haplogroup it belongs to, using the same colour scheme as Figure 1. Yellow and pink samples carry KEL1 and KEL2 haplogroups, respectively. Ellipses capture 90% of the spread of each haplogroup.

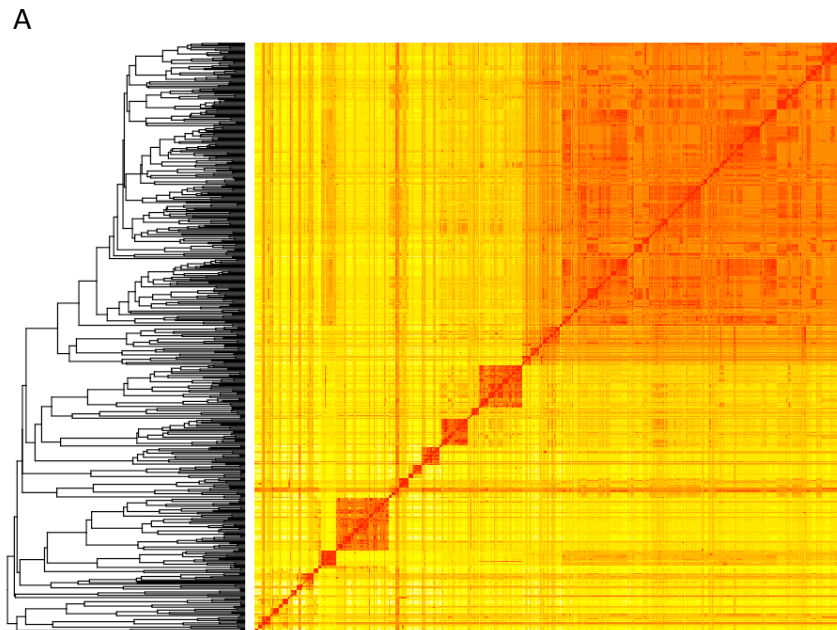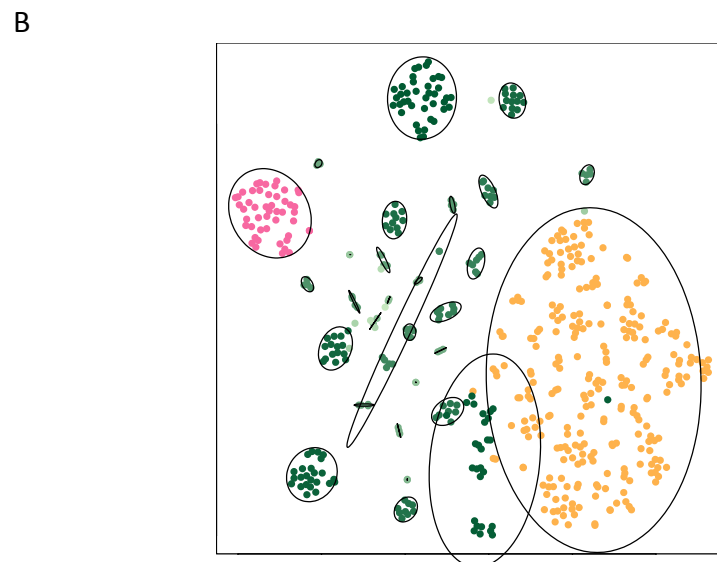



**Supplementary Figure 2. Haplotype analysis of samples carrying *kelch13* mutations.**

Haplotype diagram where each vertical column represents a SNP (MAF >1%) within approximately 100 kbp either side of the *kelch13* gene, and each horizontal line a sample; at the intersection, black lines represents a non-reference genotype allele in the sample (a read majority call is used for heterozygous genotypes). Grey line at the bottom reports the position of the SNPs within chromosome 13, with the *kelch13* genes highlighted in red. A complete hierarchical clustering dendrogram is reported on the left, based on the co-ancestry matrix calculated using statistical chromosome painting. Bold black lines join clusters whose distance is above the cut-off point (height=14) while thin grey lines show the internal structure of each cluster. Highlighted in orange and red are samples belonging to KEL1 and KEL2, respectively.

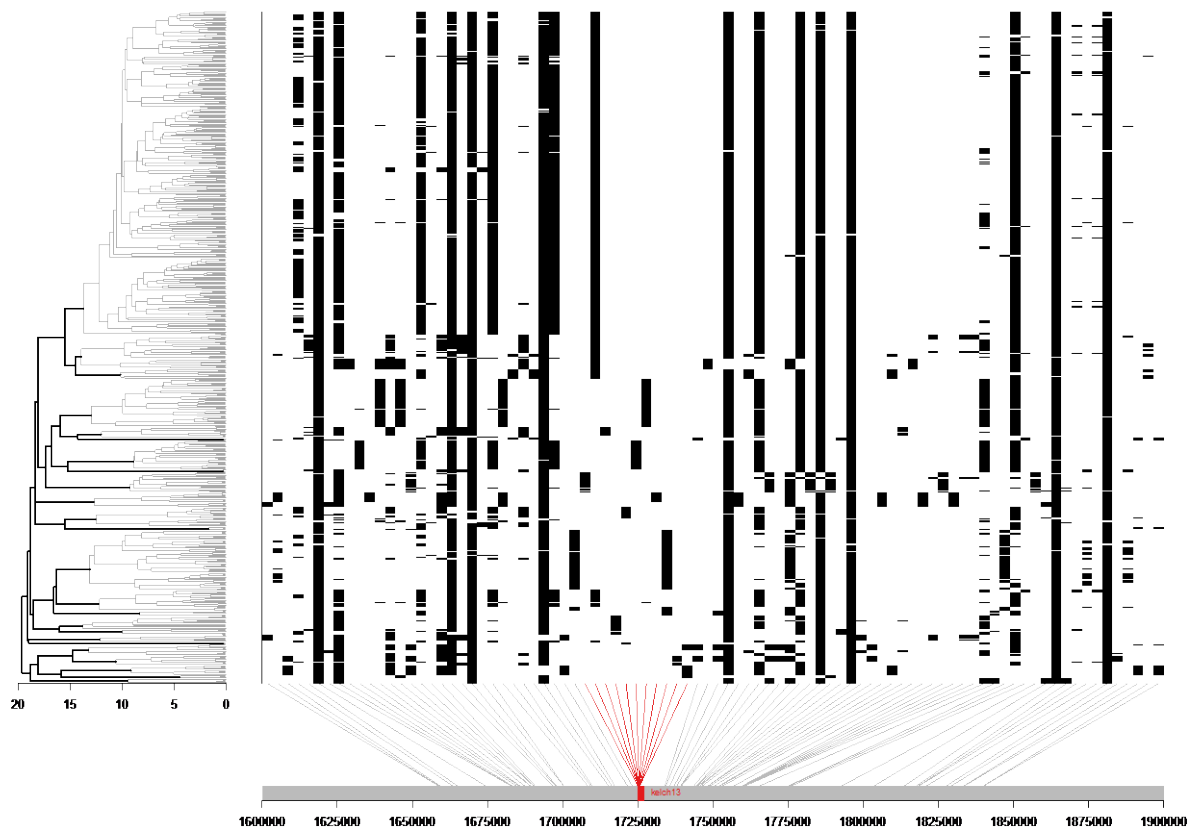

**Supplementary Figure 3. Genetic relatedness of  $\kappa$ EL1 samples to all other samples.**

Genome-wide neighbour-joining tree of all samples in the dataset based on their overall genetic similarity. Each segment represents one sample and is coloured according to the region of collection. Parasites carrying the dominant haplogroup  $\kappa$ EL1 are identified by a black dot at the tip.

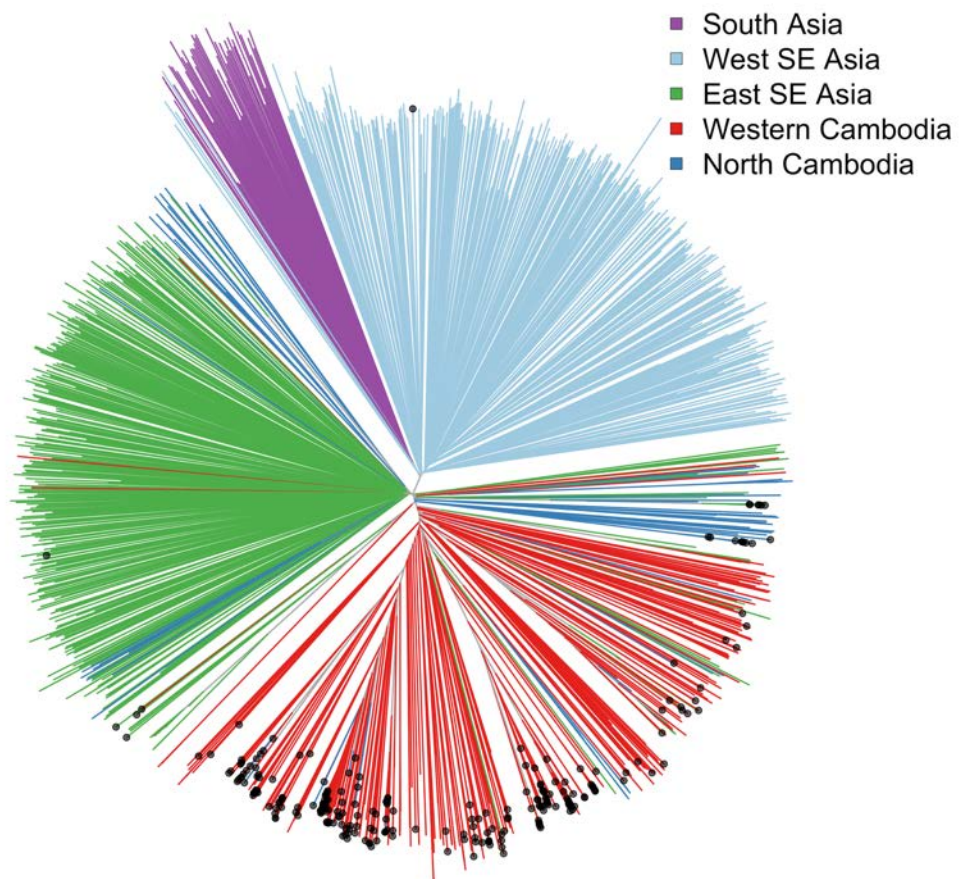

**Supplementary Figure 4. Analyses of haplotypes surrounding the *plasmepsin 2-3* genes.**

Haplotype diagram where each vertical column represents a SNP (MAF >1%) within 100 kbp around the *plasmepsin 2-3* genes, and each horizontal line a sample; at the intersection, black lines represents a non-reference genotype allele in the sample (a read majority call is used for heterozygous genotypes). Haplotypes are shown for samples carrying the amplification (top, n=199) and wild-type alleles (bottom, n=1266); 26 unclassified samples are not shown. The first column of coloured lines on the left (P23A) reports the presence of the amplification and the set of breakpoints identified (black, red, or green for each one of the three sets of breakpoints, white for wild-type). The second column reports the origin of the sample for the three major regions where amplifications are observed (WKH = western Cambodia, red; NKH = northern Cambodia, blue; WTH = northwestern Thailand, green; white = elsewhere). The last column reports the two major *kelch13* haplogroups associated with the amplification (KEL 1 = orange; KEL 2 = purple). Grey line at the bottom reports the position of the SNPs within chromosome 14, with the *plasmepsin 2-3* genes highlighted in red. A complete hierarchical clustering dendrogram is reported on the left, with mutant and wild-type samples clustered independently for clarity. The height of the joints in the dendrogram reports the maximum number of differences between any two haplotypes.

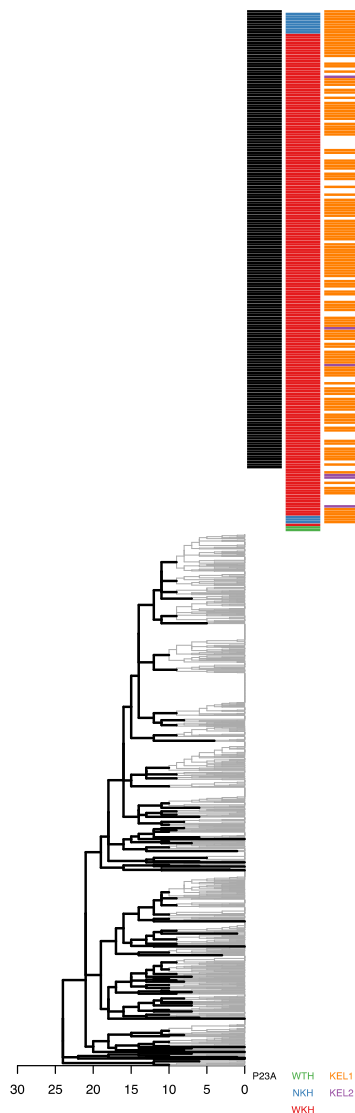

## Supplementary Note 1. Reconstruction of *kelch13* mutations epidemiological origin.

We reconstructed the probable origin of *kelch13* mutation using chromosome painting.<sup>1</sup> This method compares haplotypes in a sample to those in the remaining samples, and estimates the probability that a genome fragment originates in each of them while also accounting for recombination and *de novo* mutations.

For all and only *kelch13* homozygous mutant samples (n=553), we ran chromosome painting on the entire chromosome 13, obtaining posterior copying probabilities for all loci (an approximation of the probability of two samples being closest neighbours, for each locus, in the underlying genealogy). Mutation rate (i.e. miscopying parameter) was estimated per sample using the Watterson's estimator, and we assumed a uniform recombination map with a rate of 500 kbp/cM. The scaling parameter (termed effective population size) was set to 1000. To account for the presence of residual heterozygous genotypes due to mixed infections,  $\epsilon$  (the probability of emitting a mixed call) was set to  $10^{-8}$ .<sup>2</sup> We repeated the analysis varying this parameter set, to assess the effects of misspecification, and results were found to be very similar qualitatively (data not shown). We aggregated these probabilities by taking, for each sample, their average inside the boundaries of the *kelch13* gene (Pf3D7\_13\_v3: 1724817-1726997). Different aggregation methods, including utilising single variants inside the gene, produced identical results (data not shown). This process resulted in one "copying vector"  $k_i$  of 553 elements per sample  $i$  ( $i = 1, \dots, 553$ ) reporting the probability of that sample being close to all remaining ones in the underlying genealogy of the *kelch13* locus.

To assign samples to haplogroups, these copying vectors  $k_i$  were assembled together to form a matrix  $K$  of dimension  $553 \times 553$ , which can be interpreted as a measure of ancestral similarity between all pairs of samples. We performed a complete hierarchical clustering using as distance matrix the complement of  $\log(K + K^T)$  (Appendix, page 7). This analysis was performed using the function `hclust(method="complete")` as implemented in R version 3.3.2.<sup>3</sup> The resulting dendrogram was subsequently cut to produce discreet clusters. The cut-off was determined heuristically in order to maximise cluster homogeneity by visually inspecting: (i) the haplotype structure (Appendix, page 8); (ii) the distance matrix (Appendix, page 7); and (iii) a t-SNE reduction of the distance matrix (Appendix, page 7). This process identified 24 distinct clusters. The t-SNE representation was calculated using the R function and package `tsne` and ran with default parameters.<sup>4</sup> Finally, haplogroups were defined as groups of samples having the same *kelch13* mutation and belonging to the same cluster.

### References:

- 1 Lawson DJ, Hellenthal G, Myers S, Falush D. Inference of population structure using dense haplotype data. *PLoS Genet* 2012; **8**: e1002453.
- 2 MalariaGEN Plasmodium falciparum Community Project. Genomic epidemiology of artemisinin resistant malaria. *Elife* 2016; **5**: 1043–9.
- 3 R Development Core Team. R: A Language and Environment for Statistical Computing. Vienna, Austria, 2009 <http://www.r-project.org>.
- 4 Donaldson J. tsne: T-distributed Stochastic Neighbor Embedding for R (t-SNE). 2012. <https://cran.r-project.org/package=tsne>.

**Supplementary Note 2. Breakpoints identified for the *plasmepsin 2-3* amplification.**

The list below reports the breakpoints homology regions identified in this dataset.

**PfPlasmepsin\_1**

9.2kbp, found in 193 samples

5' - Pf3D7\_14\_v3:289611-289621

3' - Pf3D7\_14\_v3:298782-298792

**PfPlasmepsin\_2**

17.4kbp, found in 4 samples

5' - Pf3D7\_14\_v3:283034-283069

3' - Pf3D7\_14\_v3:300493-300522

**PfPlasmepsin\_3**

79.9kbp, found in 2 samples

5' - Pf3D7\_14\_v3:283034-283069

3' - Pf3D7\_14\_v3:362990-363020

### Supplementary Note 3. Alleles that characterize the KEL1 haplogroup.

We found the KEL1 haplotype to be characterized by specific alleles at a small number of sites in the regions flanking the *pfkelch13* gene. From an empirical analysis of our dataset, we found that a simple scoring scheme based on the genotypes at four of these sites correctly labels 250 out of 255 (98%) of samples that were identified as KEL1 by chromosome painting analyses.

This table shows five SNPs where KEL1 parasites carry a non-reference allele (different from the 3D7 reference genome), and are characteristic of that haplogroup. For each SNP, the table below reports: the flank of *pfkelch13* where the SNP is located; the position of the SNP in the 3D7 V3 chromosome 13 reference sequence; the 3D7 reference allele; the KEL1 characteristic allele; the SNP's distance from the C580Y mutation site.

| Flank        | Chromosome 13 Position | Allele    |          | Distance | Notes                |
|--------------|------------------------|-----------|----------|----------|----------------------|
|              |                        | Reference | KEL1     |          |                      |
| Left (5')    | 1700345                | T         | C        | -24,914  | Optional (see below) |
| Left (5')    | 1717359                | T         | G        | -7,900   |                      |
| Left (5')    | 1718288                | A         | T        | -6,971   |                      |
| <b>C580Y</b> | <b>1725259</b>         | <b>C</b>  | <b>T</b> | <b>-</b> |                      |
| Right (3')   | 1739315                | A         | G        | 14,056   |                      |
| Right (3')   | 1862741                | G         | C        | 137,482  |                      |

To test how informative these sites are, we scored each 580Y sample as follows. On each flank, we scanned away from the *pfkelch13* gene, counting the number of consecutive SNPs that carry the KEL1 allele (alone or heterozygous) but ignoring sites with missing genotypes; the scores of the two flanks were finally added together. When testing just two flanking SNPs on each side, scores > 2 correctly identified 98% of all KEL1 samples. Using all five flanking SNPs (i.e. including the optional SNP Pf3D7\_13\_v3:1700345) produces the same result using the same scoring scheme, but may be suitable when genotype missingness is high on the left flank.
